# Supplementary material
Source: PubMed Central journal article supplement (PMC10198816)
Supplement: NIHMS1873224-supplement-1.pdf [file NIHMS1873224-supplement-1.pdf]

## Supplement

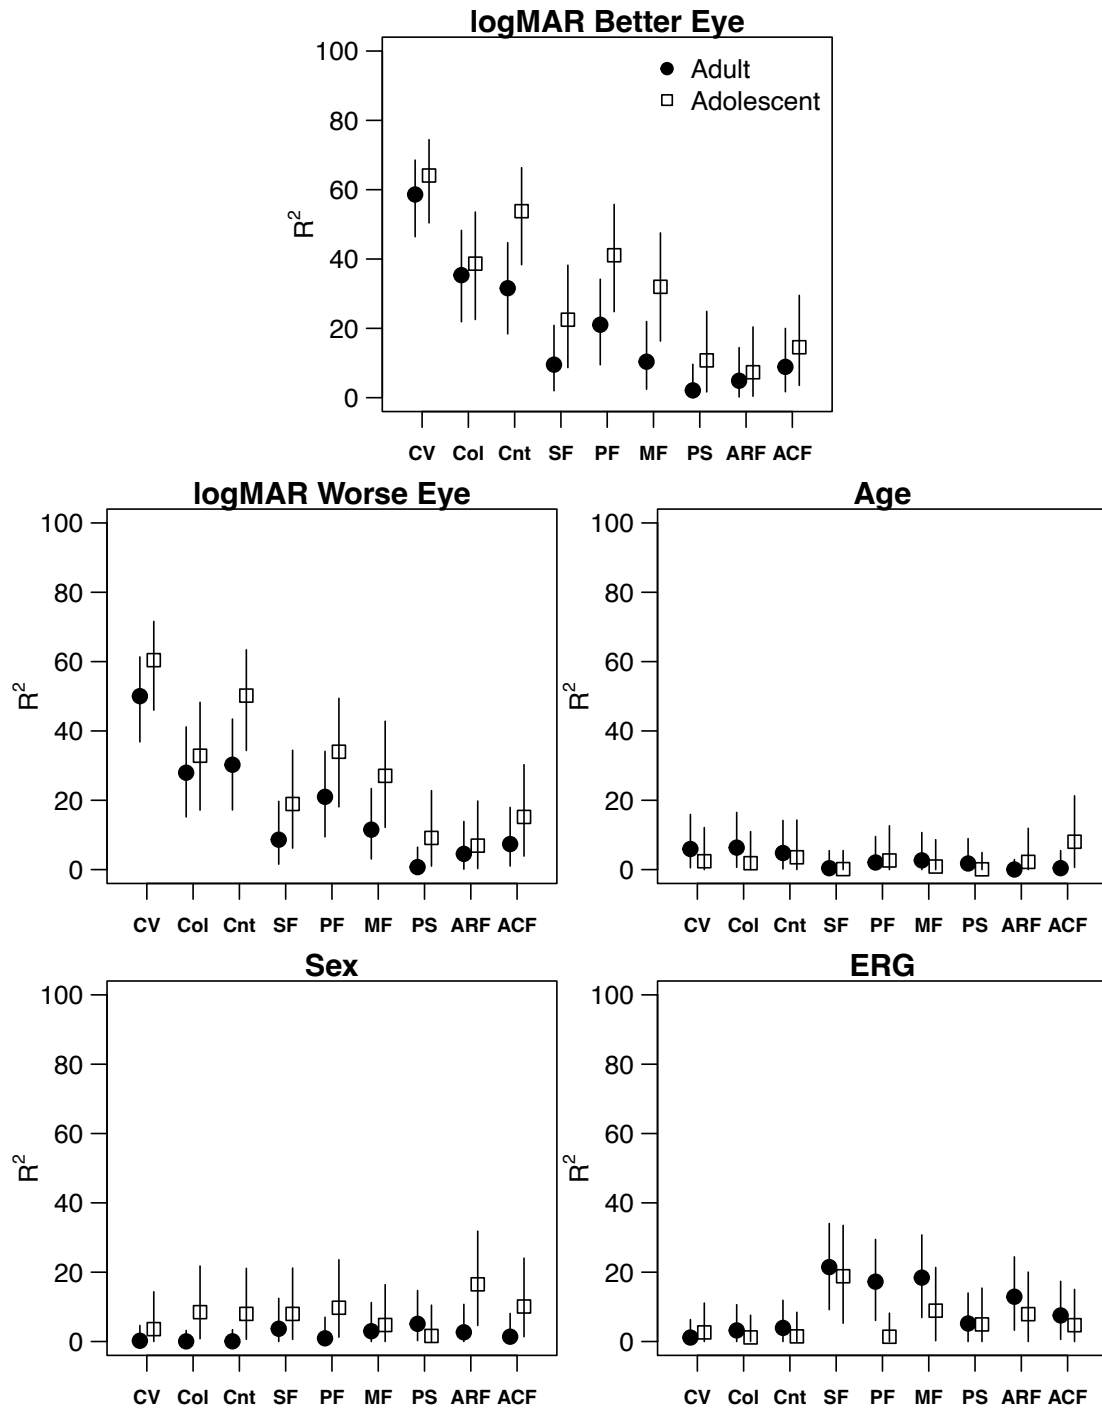

### Supplementary Material 1. Domain scores ( $\theta$ ) in adolescents in compared to adult participants from the original validation study (3,4).

LogMAR=logarithm of the minimal angle of resolution; CV=Central Vision; Col=Color Vision; Cnt=Contrast Sensitivity; SF=Scotopic Function; PP=Photopic Peripheral vision; MP=Mesopic Peripheral Vision; PS=Photosensitivity; RF=Rod Function Anxiety; CF=Cone Function Anxiety.

Supplementary Material 2. Demographic and Participant Characteristics (MRDQ/MVAQ)

|                                                              | <b>Overall</b>   |
|--------------------------------------------------------------|------------------|
| <b>Total</b>                                                 | 91               |
| <b>Female, n (%)</b>                                         | 40 (44.0)        |
| <b>Male, n (%)</b>                                           | 51 (56.0)        |
| <b>Age (years), median (interquartile range)</b>             | 16.0 (14.9–17.0) |
| <b>IRD phenotype, n (%)</b>                                  |                  |
| Rod-cone                                                     | 47 (51.6)        |
| Cone/cone-rod                                                | 33 (36.3)        |
| Macular                                                      | 11 (12.1)        |
| <b>Race, n (%)</b>                                           |                  |
| White                                                        | 57 (62.6)        |
| Black                                                        | 8 (8.8)          |
| Asian                                                        | 14 (15.4)        |
| American Indian/Alaskan Native                               | 3 (3.3)          |
| Other <sup>a</sup>                                           | 9 (9.9)          |
| <b>Corrected visual acuity, median (interquartile range)</b> |                  |
| Better eye                                                   | 0.5 (0.3–0.9)    |
| Worse eye                                                    | 0.7 (0.3–1.0)    |

MRDQ = Michigan Retinal Degeneration Question; MVAQ = Michigan Vision-Related Anxiety Questionnaire; IRD = inherited retinal disease.

<sup>a</sup>Other = Interracial + Unknown.

Supplementary Material 3. Summary of the Genetic Diagnoses of IRD Participants

| Genetic Diagnosis | Overall (%) |
|-------------------|-------------|
| <b>Total, n</b>   | 91          |
| <i>CACNA1F</i>    | 10 (11)     |
| <i>ABCA4</i>      | 9 (9.9)     |
| <i>RPE65</i>      | 5 (5.5)     |
| <i>MYO7A</i>      | 5 (5.5)     |
| <i>CRB1</i>       | 4 (4.4)     |
| <i>CNGA3</i>      | 3 (3.3)     |
| <i>CNGB3</i>      | 3 (3.3)     |
| <i>OAT</i>        | 3 (3.3)     |
| <i>RPGR</i>       | 3 (3.3)     |
| <i>AIPL1</i>      | 2 (2.2)     |
| <i>BEST1</i>      | 2 (2.2)     |
| <i>RS1</i>        | 2 (2.2)     |
| <i>USH2A</i>      | 2 (2.2)     |
| <i>OPNILW</i>     | 2 (2.2)     |
| <i>CRX</i>        | 1 (1.1)     |
| <i>BBS5</i>       | 1 (1.1)     |
| <i>BBS10</i>      | 1 (1.1)     |
| <i>DNAJC21</i>    | 1 (1.1)     |
| <i>CEP290</i>     | 1 (1.1)     |
| <i>CHM</i>        | 1 (1.1)     |
| <i>IMPG2</i>      | 1 (1.1)     |
| <i>IRX1</i>       | 1 (1.1)     |
| <i>IQCB1</i>      | 1 (1.1)     |
| <i>LRP5</i>       | 1 (1.1)     |
| <i>MERTK</i>      | 1 (1.1)     |
| <i>NMNAT1</i>     | 1 (1.1)     |
| <i>OPN1SW</i>     | 1 (1.1)     |
| <i>OPSIN</i>      | 1 (1.1)     |
| <i>OTX2</i>       | 1 (1.1)     |
| <i>PCDH15</i>     | 1 (1.1)     |
| <i>POC1B</i>      | 1 (1.1)     |
| <i>PROM1</i>      | 1 (1.1)     |
| <i>PRPF8</i>      | 1 (1.1)     |
| <i>PRPF31</i>     | 1 (1.1)     |

|              |         |
|--------------|---------|
| <i>RHO</i>   | 1 (1.1) |
| <i>SCA7</i>  | 1 (1.1) |
| <i>TULPI</i> | 1 (1.1) |
| <i>USHIC</i> | 1 (1.1) |
| Inconclusive | 7 (7.7) |
| Not tested   | 5 (5.5) |

---

Supplementary Material 4. Multivariate Model of Beta Coefficients for Associations Between Domain Scores ( $\theta$ ) and Participant Characteristics Compared Between Adolescents and Adults

| Domain ( $\theta$ )                                         | Vision in Better Eye |        | Age         |        | Sex         |        | Rod-Cone Dystrophy |        | Cone/Cone-Rod Dystrophy |        | Macular Dystrophy |        |
|-------------------------------------------------------------|----------------------|--------|-------------|--------|-------------|--------|--------------------|--------|-------------------------|--------|-------------------|--------|
|                                                             | Adolescents          | Adults | Adolescents | Adults | Adolescents | Adults | Adolescents        | Adults | Adolescents             | Adults | Adolescents       | Adults |
| <b>Michigan Retinal Degeneration Questionnaire (MRDQ)</b>   |                      |        |             |        |             |        |                    |        |                         |        |                   |        |
| Central Vision                                              | 0.987                | 1.197  | 0.086       | 0.007  | -0.141      | -0.071 | -0.124             | -0.059 | 0.010                   | 0.123  | -0.028            | 0.019  |
| Color Vision                                                | 0.941                | 0.860  | 0.108       | 0.008  | -0.522      | -0.089 | -0.054             | -0.033 | 0.315                   | 0.213  | -0.569            | -0.142 |
| Contrast Sensitivity                                        | 0.955                | 0.841  | 0.113       | 0.007  | -0.335      | -0.182 | -0.068             | 0.002  | -0.010                  | 0.224  | -0.158            | -0.235 |
| Scotopic Function                                           | 0.587                | 0.479  | 0.015       | 0.005  | -0.290      | -0.496 | 0.294              | 0.354  | -0.412                  | -0.050 | -0.394            | -0.794 |
| Photopic Peripheral Vision                                  | 0.782                | 0.673  | 0.096       | 0.008  | -0.389      | -0.316 | 0.107              | 0.311  | 0.050                   | -0.067 | -0.368            | -0.670 |
| Mesopic Peripheral Vision                                   | 0.668                | 0.477  | 0.049       | 0.010  | -0.169      | -0.444 | 0.054              | 0.334  | -0.379                  | -0.038 | -0.425            | -0.760 |
| Photosensitivity                                            | 0.480                | 0.282  | 0.027       | 0.003  | -0.273      | -0.507 | -0.420             | -0.161 | 0.143                   | 0.413  | -0.407            | -0.031 |
| <b>Michigan Vision-Related Anxiety Questionnaire (MVAQ)</b> |                      |        |             |        |             |        |                    |        |                         |        |                   |        |
| Rod Function Anxiety                                        | 0.205                | 0.338  | 0.060       | 0.001  | -0.416      | -0.392 | 0.154              | 0.264  | -0.064                  | -0.106 | -0.261            | -0.549 |
| Cone Function Anxiety                                       | 0.424                | 0.486  | 0.161       | -0.003 | -0.501      | -0.328 | -0.022             | -0.188 | 0.470                   | 0.476  | 0.107             | -0.043 |

Beta coefficients of adults were from participants of the original validation study (3,4).
